# Supplementary material for: Identification and ranking of recurrent neo-epitopes in cancer
Source: BMC Med Genomics. 2019 Nov 27;12:171. doi: 10.1186/s12920-019-0611-7 (PMC6882202; doi:10.1186/s12920-019-0611-7)

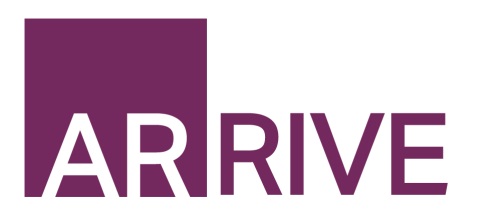


The ARRIVE Guidelines Checklist

Animal Research: Reporting In Vivo Experiments

Carol Kilkenny1, William J Browne2, Innes C Cuthill3, Michael Emerson4 and Douglas G Altman5

*1The National Centre for the Replacement, Refinement and Reduction of Animals in Research, London, UK, 2School of Veterinary Science, University of Bristol, Bristol, UK, 3School of Biological Sciences, University of Bristol, Bristol, UK, 4National Heart and Lung Institute, Imperial College London, UK, 5Centre for Statistics in Medicine, University of Oxford, Oxford, UK.*

|  | | ITEM | RECOMMENDATION | Section/ Paragraph |
| --- | --- | --- | --- | --- |
| 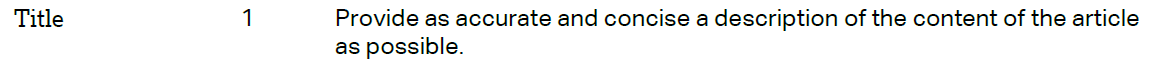 | | | Title |
| 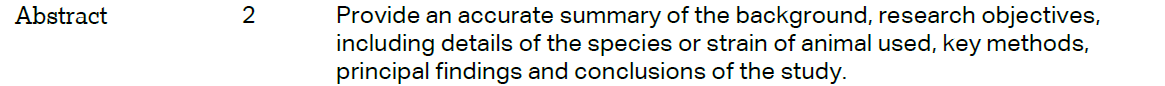 | | | Abstract NA |
| INTRODUCTION | | |  |
| 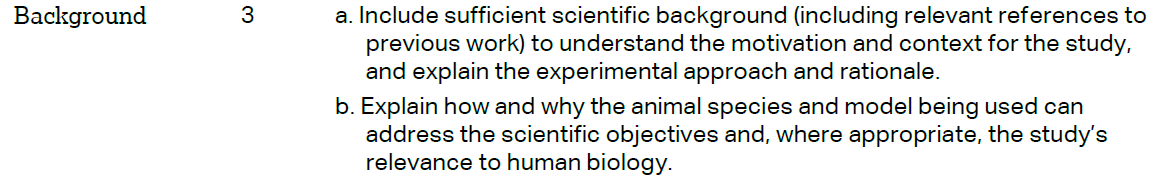 | | | Background Paragraphs 1 & 2 (a)  Results - Confirmational evidence Paragraph 4 (b) |
| 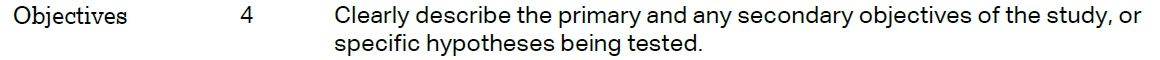 | | | Paragraph 3 |
| METHODS | | |  |
| 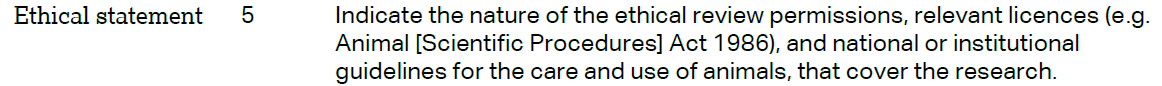 | | | Declaration paragraph 1 |
| 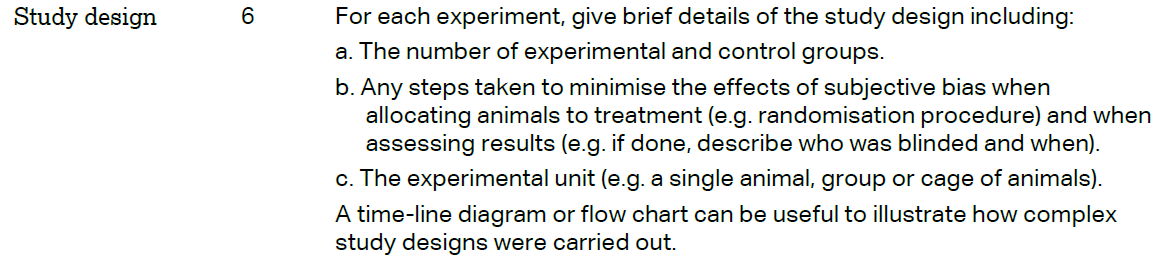 | | | NA |
| 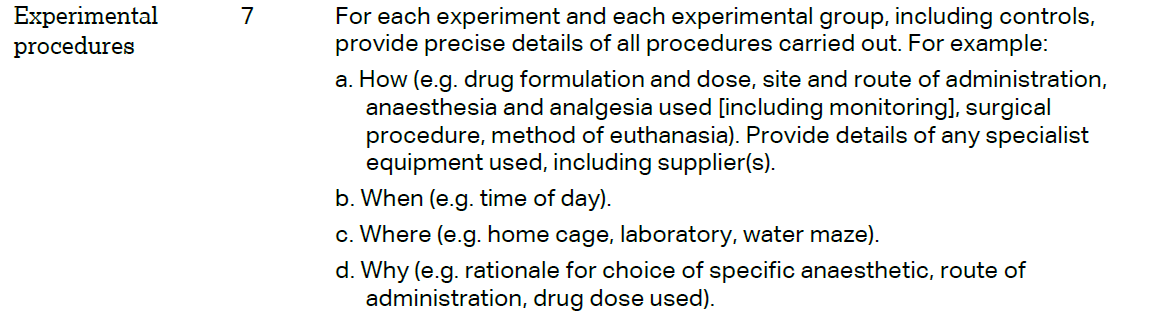 | | | Methods - Mice paragraph 1 (c) &  Methods - Generation of mutation-specific T cells in ABabDII mice paragraph 1 (a)  (b) (c) NA |
| 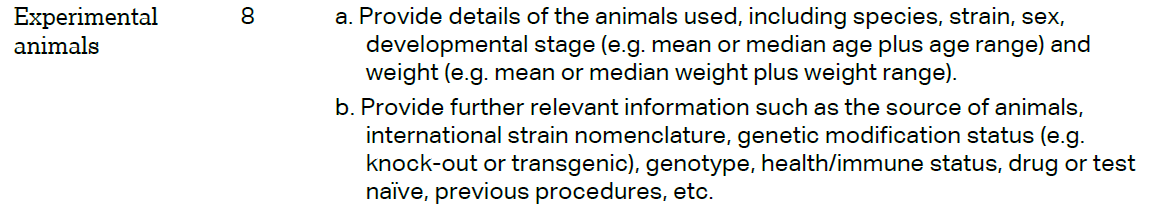 | | | Methods - Generation of mutation-specific T cells in ABabDII mice paragraph 1  (a) (b) |

The ARRIVE guidelines. Originally published in *PLoS Biology*, June 20101

| 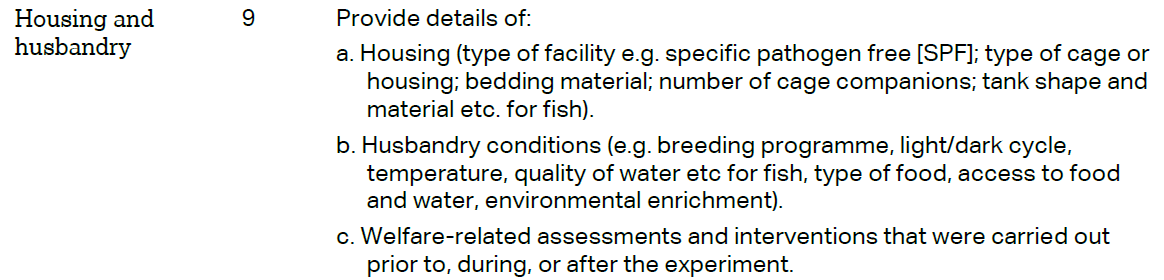 | Methods - Mice paragraph 1  (a) (b)  (c) NA | |
| --- | --- | --- |
| 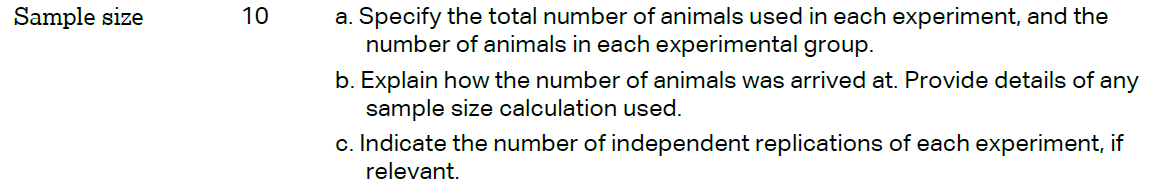 | Methods - Generation of mutation-specific T cells in ABabDII mice paragraph 1  (a) | |
| 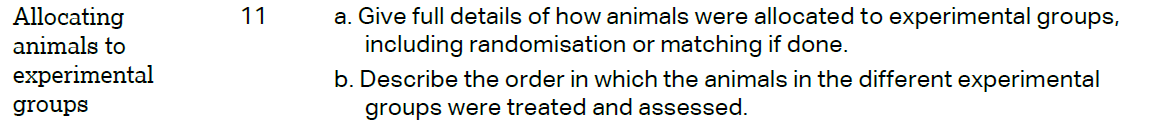 | NA | |
| 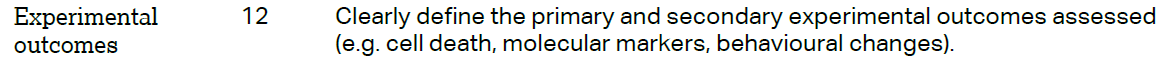 | Results - Confirmational evidence paragraph 4 | |
| 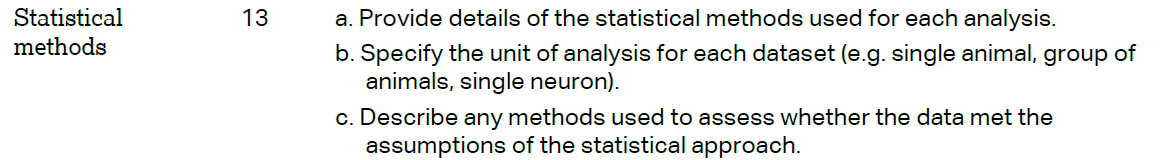 | NA (Sample size as judged from overlapping complete TCR repertoire) | |
| RESULTS |  | |
| 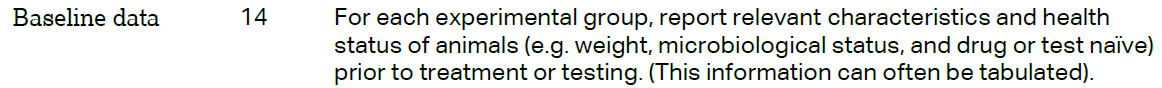 | NA | |
| 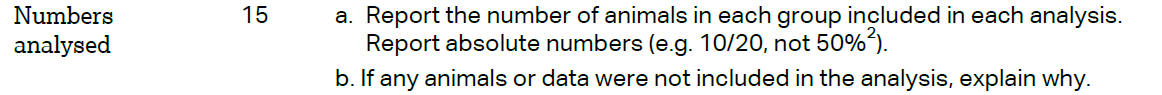 | Methods - Generation of mutation-specific T cells in ABabDII mice paragraph 1 | |
| 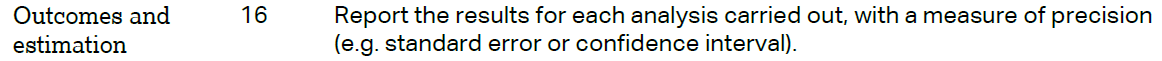 | Results - Confirmational evidence paragraph 4 | |
| 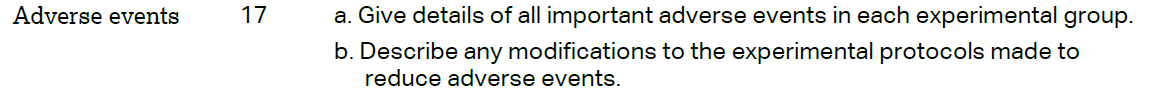 | NA | |
| DISCUSSION |  | |
| 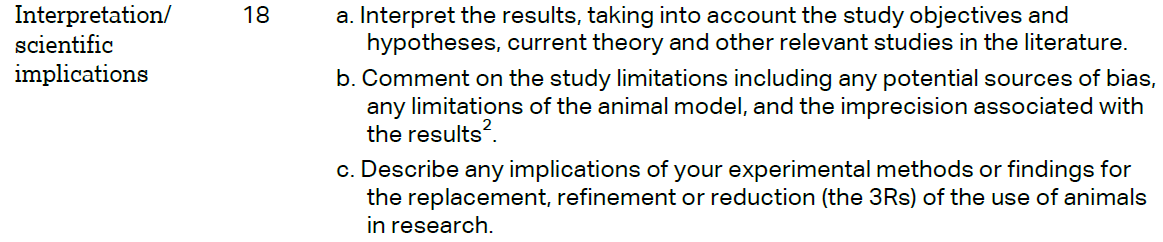 | Discussion paragraph 5 (a)  NA (b)  NA (c) | |
| 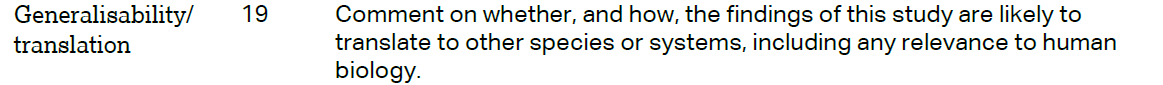 | Results - Confirmational evidence paragraph 4 | |
| 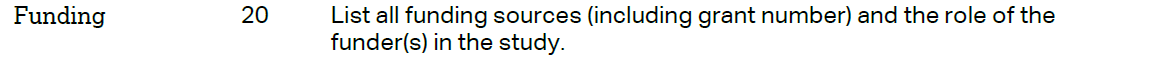 | | Declaration paragraph 5 |


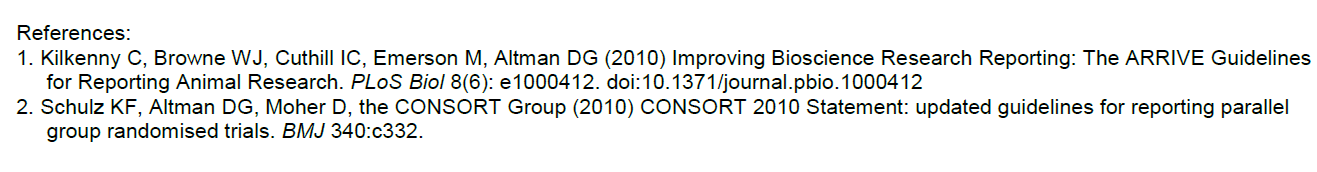

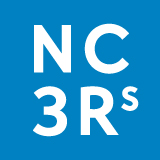

Supplement: Supplementary file 9 — Additional file 9 ARRIVE checklist concerning the animals used for the experimental validation of the in vivo presentation of two peptides. [file 12920_2019_611_MOESM9_ESM.docx]
